# Supplementary material for: Molecular dynamics simulation on the mechanical properties of natural-rubber-graft-rigid-polymer/rigid-polymer systems
Source: Royal Society of Chemistry journal article supplement (doi:10.1039/c7cp07807b), 2018-01-01
Supplement: c7cp07807b1.pdf [file c7cp07807b1.pdf]

## **Electronic Supplementary Information**

### **Molecular Dynamics Simulation on Mechanical Properties of Natural-Rubber-Graft-Rigid-Polymer/Rigid-Polymer Systems**

Meng Wei, Pengxiang Xu, Yizhong Yuan,\* Xiaohui Tian,\* Jinyu Sun and Jiaping Lin

Key Laboratory for Ultrafine Materials of Ministry of Education and Shanghai Key Laboratory of Advanced Polymeric Materials, School of Materials Science and Engineering, East China University of Science and Technology, Shanghai 200237, China

\*(Y.-Z.Y.) E-mail: yizhongyuan2004@hotmail.com

\*(X.-H.T.) E-mail: tianxh@263.net

## 1. The standard 12/6 Lennard-Jones (LJ) potential

The standard 12/6 Lennard-Jones (LJ) potential  $U_r$  (Eq. 1 in the main text) are used for non-bonded pairs of particles. The  $U_r$  at  $r = 2^{1/6}$  is the global minimum, where the function changes the sign of slope (see Fig. S1). That is to say the interactions change from repulsion to attraction at  $r = 2^{1/6}$ .

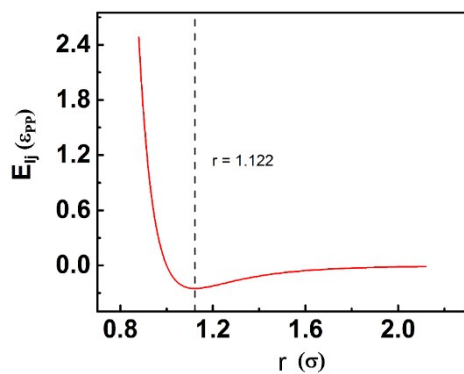

**Fig. S1.** Curve of  $E_{ij}$  with respect to  $r$ .

## 2. Energy changes in the equilibrium process

In the equilibrium process, we examined the temporal evolution of the morphologies and the total energy of systems. Fig. S2 shows the curve of total energy versus time of a typical system ( $N_{30-g-(R_3)_6}/R_{10}$  with NR polymer beads : Rigid polymer beads = 1:1 and  $\varepsilon_{RR} = 5.0$ ). It can be seen that the total energy drops first and then maintains a constant value with little fluctuation. After  $1 \times 10^7$  steps, the total energy is stabilized and the morphology is not changed (insets of Fig. S2), and thus it can be considered that the system has reached equilibrium for a relative long time ( $5 \times 10^7$  steps).

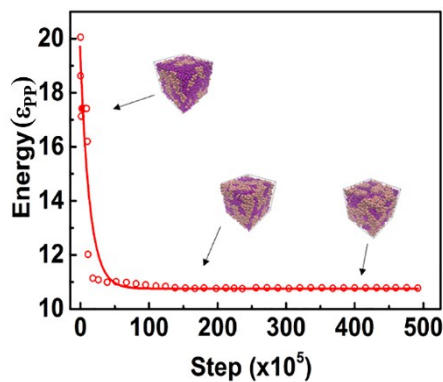

**Fig. S2.** Curve of energy as a function of step in the  $N_{30-g-(R_3)_6}/R_{10}$  systems with NR polymer beads : rigid polymer beads = 1:1 and  $\varepsilon_{RR} = 5.0$ .

### 3. External effect of stretching velocities on mechanical properties of $N_{30}\text{-}g\text{-(}R_3\text{)}_6/R_{10}$ blend systems

Second-order Legendre<sup>S1</sup> polynomials  $P_2$  was employed to further characterize the bond orientation of the systems, and the value of  $P_2$  reflects the chain orientation. The results at various stain rates are shown in Fig. S3.  $P_2$  increases continuously with increase in strain. However, the values of  $P_2$  are almost the same in the five different strain rate systems, but a slightly larger in systems with higher strain rate during the tensile process. This indicates that systems with different strain rates have similar degree of bond orientation, which contributes similarly to the mechanical properties in terms of entropy loss.

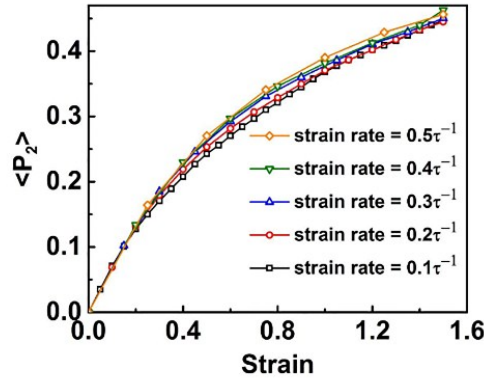

**Fig. S3.** Second-order Legendre polynomials  $P_2$  at various strain rates from  $0.1\tau^{-1}$  to  $0.5\tau^{-1}$  for  $N_{30}\text{-}g\text{-(}R_3\text{)}_6/R_{10}$  systems at  $\epsilon_{RR} = 5.0$ .

## 4. Internal effects on mechanical properties of $N_{30}\text{-g}\text{-(R}_3)_6\text{/R}_{10}$ systems

### 4.1 Effects of FENE Potential on mechanical properties of $N_{30}\text{-g}\text{-(R}_3)_6\text{/R}_{10}$ systems

The modified finite extensive nonlinear elastic potential,<sup>S2</sup> namely FENE potential (Eq. 2 in the main text), was used to determine the interaction between the adjacent bonded polymer beads, which is the intramolecular interactions.  $k$  is the parameter to control the strength of the interactions. Fig. S4 shows the stress-strain curves for  $N_{30}\text{-g}\text{-(R}_3)_6\text{/R}_{10}$  systems at various  $k$ ; stress increases rapidly at the beginning of the tensile process, and then increases mildly at large strain for all various systems. Nevertheless, the tensile behaviors among different interaction strengths are nearly the same but noisy, indicating a reasonable fact that the mechanical property is not mainly determined by the intramolecular interaction but by the intermolecular interaction. Moreover, the curves of the systems with stronger intramolecular interactions show larger fluctuation, which means higher deviations.

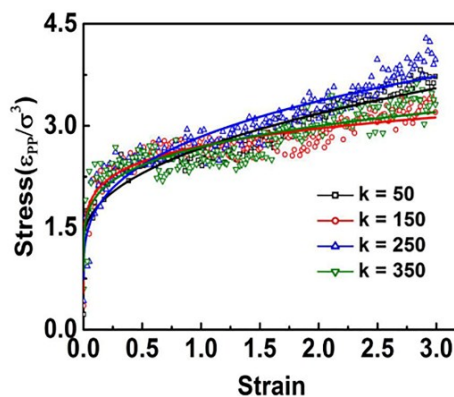

**Fig. S4.** Representative stress-strain curves for  $N_{30}\text{-g}\text{-(R}_3)_6\text{/R}_{10}$  systems at various FENE parameter  $k$ .

## 4.2 Effect of nonbonding interaction strength of $\epsilon_{RR}$ on mechanical properties for $N_{30}\text{-}g\text{-(}R_3\text{)}_6/R_{10}$ systems

The non-bonded interaction within rigid polymer beads is the important factor in determining the mechanical properties relative to the bonded interaction. Representative stress-strain curves of  $N_{30}\text{-}g\text{-(}R_3\text{)}_6/R_{10}$  blends at various  $\epsilon_{RR}$  are shown in Fig. S5a. As  $\epsilon_{RR}$  increases, the stress increases at the same strain, which rises more remarkable at large strain. As can be seen in Fig. S5b,  $P_2$  increases with increasing strain, but it shows similar behaviors during the tensile process in systems with different  $\epsilon_{RR}$ . This result suggests that with various  $\epsilon_{RR}$ , systems have almost the same degree of bond orientation, which makes similar contributions to the mechanical properties.

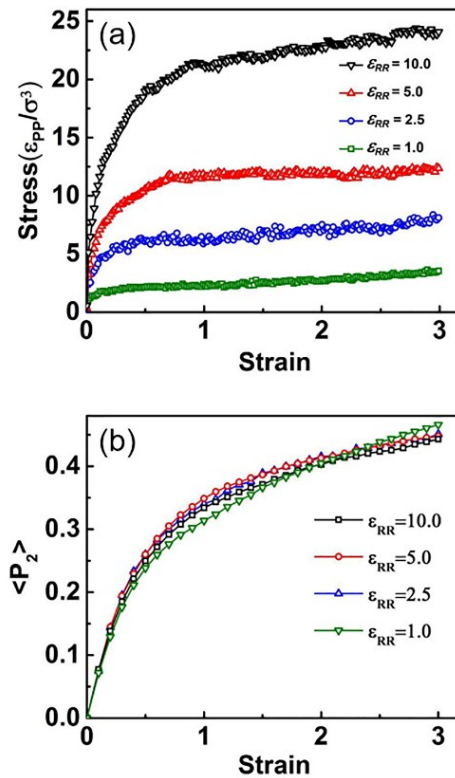

**Fig. S5.** (a) Stress-strain curves for  $N_{30}\text{-}g\text{-(}R_3\text{)}_6/R_{10}$  systems at different  $\epsilon_{RR}$  with strain rate of  $0.2\tau^{-1}$ . (b)  $P_2$  as a function of strain for  $N_{30}\text{-}g\text{-(}R_3\text{)}_6/R_{10}$  systems at various  $\epsilon_{RR}$ .

### 4.3 Effect of rigid polymer proportion on mechanical properties for $N_{30}\text{-g-(R}_3)_6/R_{10}$ systems

Stress-strain curves for various proportions of rigid polymer were shown in Fig. S6a. With the addition of rigid polymers, the stress increases continuously. However, when the proportion of rigid polymers further increases to 80%, the stress stops increasing and is about the same with that in the blends of 75% rigid proportion. The result suggests that the enhancement of the mechanical properties of the blends by addition of rigid polymers will be saturated. The effective bond length was calculated as shown in Fig. S6b,  $l_{b,\text{eff}}$  increases gradually at small strain then has little changes at large strain during the tensile process. Also, the value of  $l_{b,\text{eff}}$  was found to be smaller at the same strain in systems with more rigid polymers, which means that stronger attraction between numerous rigid polymer beads makes the average bond length shorter.

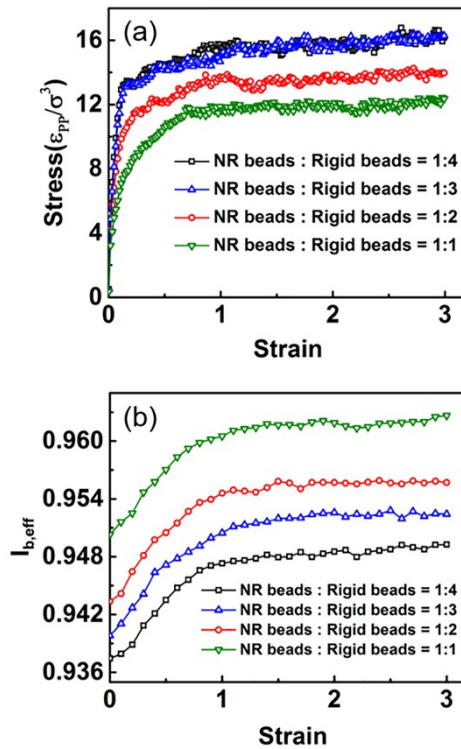

**Fig. S6.** (a) Stress-strain curves at different ratios of NR beads to rigid beads for  $N_{30}\text{-g-(R}_3)_6/R_{10}$  systems with strain rate =  $0.2\tau^{-1}$ . (b)  $l_{b,\text{eff}}$  as a function of strain for  $N_{30}\text{-g-(R}_3)_6/R_{10}$  systems at various ratios of NR beads to rigid beads.

#### 4.4 Effect of architecture parameters on mechanical properties for rigid-polymer-grafted-NR/rigid-polymer system

We studied the effects of architecture parameters in systems with the same molecular number in each type, which means we varied the length and the number of the graft chains by fixing the number of rigid molecules and rigid-polymer-grafted-NR molecules (180 rigid molecules and 150 rigid-polymer-grafted-NR molecules). Stress-strain curves were shown in Fig. S7a. Stress increases rapidly with increasing strain at small strain. Larger values of the stress were found at small strain in systems where NR-graft-rigid-polymer molecules have more graft chains. However, stress increases continuously in systems where NR-graft-rigid-polymer molecules have longer graft chains. Moreover, almost the same values of the stress were found at large strain in systems in which NR-graft-rigid-polymer molecules have the same length of graft chains, suggesting that the increase in stress at large strain is mostly contributed by the length of the graft chains, while that is contributed by the number of graft chains at small strain. As shown in Fig. S7b,  $P_2$  increases with increasing strain. Moreover, larger values of  $P_2$  were found in systems at large strain where NR-graft-rigid-polymer molecules have longer graft chains, which exhibits larger degree of bond orientation during the tensile process. From Fig. S7c, we can see that  $l_{b,eff}$  increases with increasing strain at small strain and then has slight increases at large strain in the systems where NR-graft-rigid-polymer molecules have shorter graft chains. Moreover, durative increases in  $l_{b,eff}$  were found in systems in which NR-graft-rigid-polymer molecules have longer graft chains, suggesting that increase in stress at large strain is contributed from the length of graft chain, which causes large increase in entropy loss in the form of  $l_{b,eff}$ . Moreover, the values of  $l_{b,eff}$  is small in systems where NR-graft-rigid-polymer molecules have longer of greater number of graft chains. This



suggests that larger number of graft chains or longer graft chains in a NR-graft-rigid-polymer will lead to a system with more rigid polymers. And rigid polymer has stronger attractions, which causes shortening of average length of the bonds. As can be seen in Fig. S7d,  $\Delta E_{\text{pair}}$  increases rapidly to the plateaus then has slight changes at large strain during the tensile test. Moreover, we found that the height of the curve is determined by the number of graft chains in a NR-graft-rigid-polymer, and larger values of  $\Delta E_{\text{pair}}$  were found in systems in which NR-graft-rigid-polymer molecules have more graft chains. This demonstrates that the contribution of enthalpy gain in the form of  $\Delta E_{\text{pair}}$  to the increase in stress is dominated by the number of the graft chains in a NR-graft-rigid-polymer at small strain. The increases in both entropy loss and enthalpy gain contribute to the increase in stress at small strain, while larger entropy loss is caused by the continuous increase in  $l_{\text{b,eff}}$ , which leads to the increase in stress at large strain.

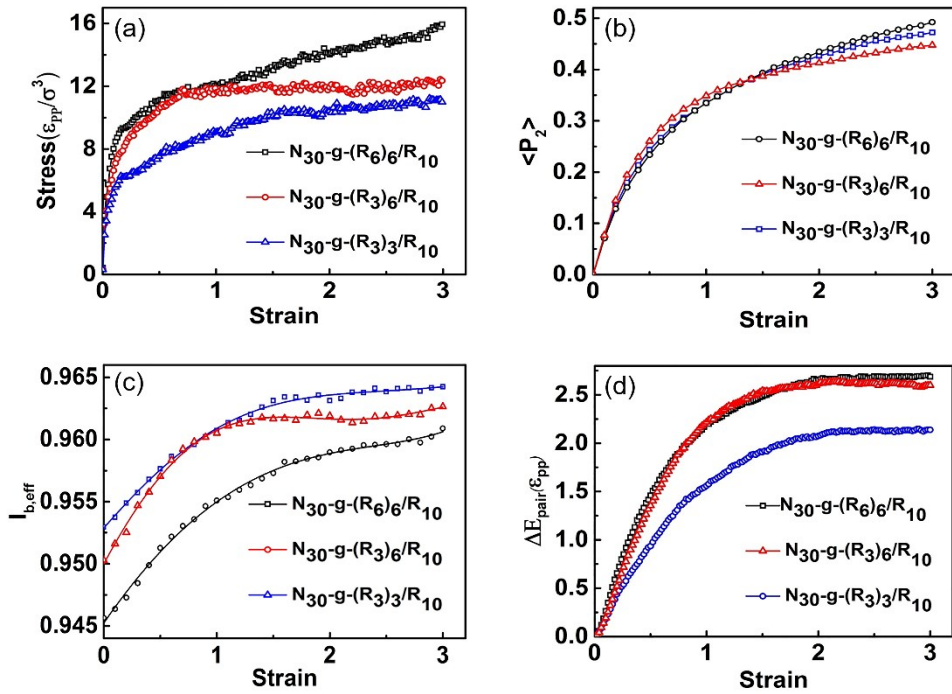

**Fig. S7.** (a) Stress-strain curves for various architecture parameters in systems with fixed molecular numbers in each type. (b) The bond orientation  $P_2$  versus strain for various architecture parameters. (c)  $l_{\text{b,eff}}$  for various architecture parameters with respect to strain. (d)  $\Delta E_{\text{pair}}$  as a function of strain for various architecture parameters.

Fig. S8 shows  $P_2$  with respect to strain for various architecture parameters in systems with fixed 9000 polymer beads.  $P_2$  increases with increasing strain, and almost the same values of  $P_2$  in different systems were found at small strain. Furthermore, larger values of  $P_2$  at large strain were found in the systems where NR-graft-rigid-polymer molecules have longer graft chains; however, as for the systems where NR-graft-rigid-polymer molecules have the same length of the graft chains, larger value of  $P_2$  were found in which NR-graft-rigid-polymer molecules have small number of graft chains. It means that the blends where NR-graft-rigid-polymer molecules have fewer or longer graft chains have larger degree of bond orientation during the tensile process.

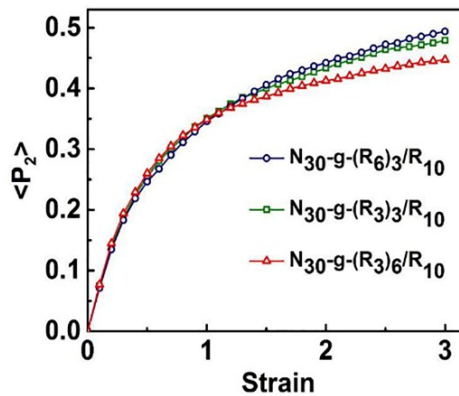

**Fig. S8.**  $P_2$  as a function of strain for various architecture parameters in systems with constant number of polymer beads (9000).

## 5. The behaviors of the effective bond length at small strain for blend systems

The relationship of  $l_{b,eff}$  and strain at small strain (0~0.1) are also examined and shown in Fig. S9. It can be seen that the changes of  $l_{b,eff}$  for the two systems at small strain ( $<0.04$ ) are close, and thus the systems of  $N_{30}-g-(R_3)_6/R_{10}$  and  $N_{30}/R_{10}$  have the same stress-strain behavior at small strain ( $<0.04$ ).

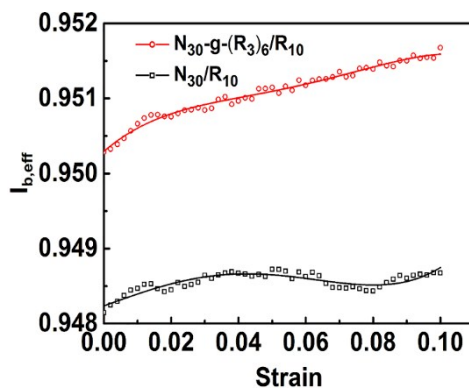

**Fig. S9.**  $l_{b,eff}$  as a function of the strain at small strain (0~0.1).

## References

- S1 J. Liu, Y. Wu, J. Shen, Y. Gao, L. Zhang and D. Cao, *Phys. Chem. Chem. Phys.*, 2011, **13**, 13058-13069.
- S2 J. Liu, S. Wu, L. Zhang, W. Wang and D. Cao, *Phys. Chem. Chem. Phys.*, 2011, **13**, 518-529.
